# Supplementary material
Source: PubMed Central journal article supplement (PMC10966893)
Supplement: NIHPP2023.11.01.565120v2-supplement-2.pdf [file NIHPP2023.11.01.565120v2-supplement-2.pdf]

## An Interactive Quality Control Tool for Highly Multiplex Microscopy

### 377 **Supplementary Note 1: Impact of image background subtraction on derived single-cell data.**

378 Background subtraction is commonly used with multiplexed imaging to remove autofluorescence and  
379 fluorescence arising from non-specific antibody binding to the specimen. However, we identified a number of  
380 challenges associated with this approach. For example, plotting histograms of the distribution of per-cell signal  
381 intensities channel in the pre-QC TOPACIO dataset revealed small numbers of cells with zero-valued signal  
382 intensities in all channels (**Supplementary Fig. 2a**). We reasoned that this effect was due to rolling ball image  
383 background subtraction<sup>45</sup> which was used to increase antibody signal-to-noise, but which had the unanticipated  
384 consequence of creating cells with signal intensities equal to zero that, after log-transformation, were far lower  
385 than values associated with other cells in the image. This effect was readily observed when the UMAP  
386 embedding was colored by channel signal intensity, as it revealed small clusters of extremely dim cells among  
387 much larger numbers of clusters whose signals were comparatively bright (**Supplementary Fig. 2b,c**). Using  
388 the panCK channel to better understand how cells with low signal intensities impacted the TOPACIO  
389 clustering result, we found that clusters within meta-cluster B (e.g., cluster 14) were exclusively composed of  
390 cells with zero-valued signals, while those in meta-cluster C (e.g., cluster 174) had signals that were all  $> 0$ ,  
391 and those in meta-cluster F (e.g., cluster 197) were comprised of a mixture of cells with zero and non-zero  
392 signals (**Supplementary Fig. 2d**). The simple removal of cells with zero-value signal intensities from the pre-  
393 QC TOPACIO dataset (with no other quality control measures) eliminated small dark clusters characterized by  
394 very low signal intensities and significantly increased the resolution between immunopositive and  
395 immunonegative cell populations as seen in both the channel intensity histograms (**Supplementary Fig. 2e**)  
396 and UMAP embeddings colored by channel (**Supplementary Fig. 2f**). Resolution between positive and  
397 negative cells was further improved in the post-QC TOPACIO clustering after the removal of cells with near-  
398 zero signal intensities in addition to other artefacts (**Supplementary Fig. 2g,h**). This was also true of Dataset 6  
399 (CODEX; **Supplementary Fig. 2i,j**). Thus, while background subtraction is useful for improving data quality,  
400 especially for low signal-to-noise antibodies, our analysis shows that it can skew the natural distribution of  
401 protein signals in an image and have a profound effect on the interpretation of single-cell data due to the  
402 spurious formation of irrelevant cell clusters. When using background subtraction, it is important to control for  
403 these problems.

## An Interactive Quality Control Tool for Highly Multiplex Microscopy

### 404 **Supplementary Note 2: Developing a DL model for automated artefact detection.**

405 Although tools based on visual review are common in microscopy, there are obvious benefits to  
406 machine learning approaches<sup>46-49</sup>. To generate initial training data for a DL model to automatically flag  
407 arbitrary artefacts in multiplex IF images, three human annotators assembled ground truth artefact masks for 24  
408 CyCIF channels in 11 serial tissue sections of the CRC dataset analyzed in this study (Dataset 2,  
409 **Supplementary Fig. 1b**). Single channel images (and their corresponding ground truth artefact masks) were  
410 cropped into 2048x2048-pixel image tiles. After class balancing, a total of 3,787 tiles were split 9:1 into  
411 training (3,409) and validation (378) sets. Tissue images differed with respect to the channels that were  
412 affected by artefacts (**Supplementary Fig. 3a**). The number of tiles containing artefacts also differed between  
413 images, ranging from as many as 463 tiles in image 59 to as few as 129 in image 64 (**Supplementary Fig. 3b**).  
414 Of the 3,787 total tiles, 1,734 contained pixels annotated as artefacts. Across all tiles, the average percentage of  
415 pixels affected by artefacts was ~6.7% (**Supplementary Fig. 1c**).

416 Our DL model comprised a pretrained ResNet34 encoder<sup>50</sup> coupled to a Feature Pyramid Network  
417 (FPN)<sup>51</sup> decoder (ResNet-FPN). The input of the model were image tiles and its output was predicted binary  
418 artefact masks. To assess the technical reproducibility of artefact predictions, three independent ResNet-FPN  
419 models were trained to convergence starting from FPN network weights initialized using different random  
420 seeds. Validation loss (measured via Dice similarity coefficient) ranged from 0.426 to 0.459 (mean = 0.444).  
421 To determine the ability of the trained models to generalize across different marker channels, testing was  
422 performed on channel 29 of tissue section 54 (**Supplementary Fig. 3d**), which contained artefacts not found in  
423 other sections or channels (**Supplementary Fig. 3a**). Performance was assessed by precision-recall (PR) and  
424 receiver operating characteristic (ROC) curve analysis. Average precision (AP) ranged from 0.30 to 0.33 for  
425 the three models (**Supplementary Fig. 3e**) and area under the ROC curve (AUC) ranged between 0.71 and  
426 0.75 (**Supplementary Fig. 3f**). This demonstrates that the assembly of a DL model for artefact detection in  
427 high-plex tissue images is feasible. However, we judge the overall level of performance relative to human  
428 reviewers to be inadequate and we strongly suspect that this is due to insufficient training data. CyLinter is  
429 nevertheless an ideal way to generate additional training data. Thus, we have established a deposition site at the  
430 Synapse data repository (Sage Bionetworks, <https://www.synapse.org/#!/Synapse:syn24193163/wiki/624232>)  
431 for collecting CyLinter-curated image artefacts. We anticipate that further training of our ResNet-FPN model  
432 on this corpus of collected artefacts will ultimately yield a highly-performant model for integration into future  
433 iterations of the CyLinter workflow.

## An Interactive Quality Control Tool for Highly Multiplex Microscopy

### 434 FIGURES/LEGENDS

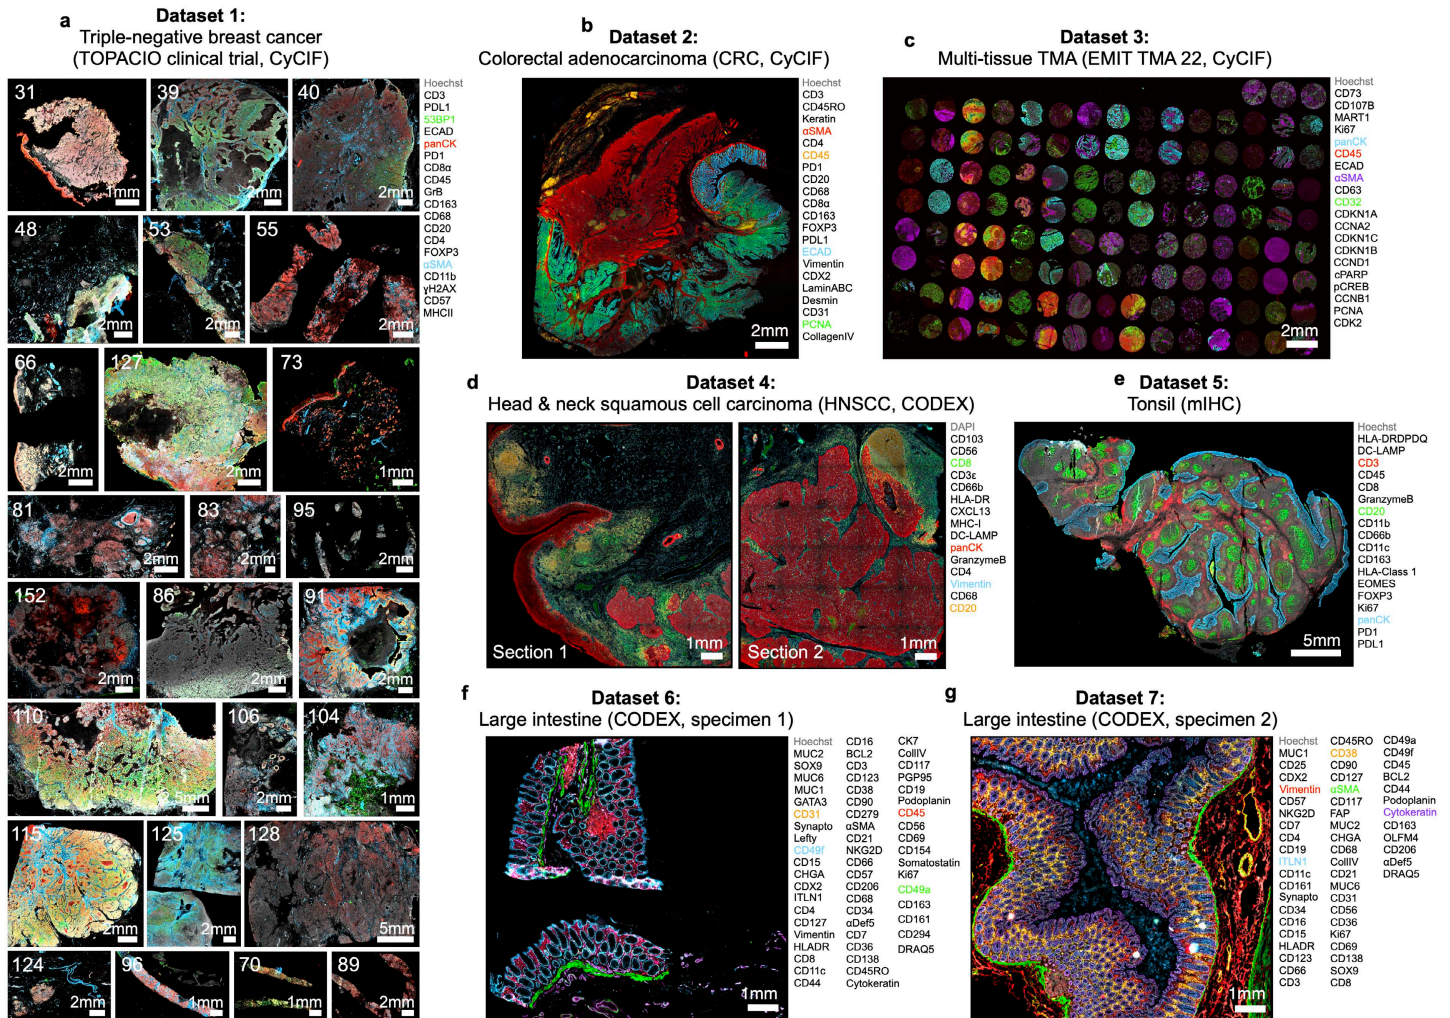

435

### 436 Supplementary Fig. 1 | Overview of the seven multiplex IF datasets analyzed in this study.

437 **a**, Dataset 1 (TOPACIO, CyCIF): 25 human TNBC clinical trial specimens (~6-353 mm<sup>2</sup>). Numbers in upper  
 438 left of each panel indicate specimen number. Channels shown are Hoechst (gray), 53BP1 (green), panCK (red),  
 439 and  $\alpha$ SMA (blue). **b**, Dataset 2 (CRC, CyCIF): an ~172 mm<sup>2</sup> whole-slide section of primary human colorectal  
 440 adenocarcinoma. Channels shown are Hoechst (gray),  $\alpha$ SMA (red), CD45 (orange), ECAD (blue), and PCNA  
 441 (green). **c**, Dataset 3 (EMIT TMA22, CyCIF): 123 healthy and diseased human tissue cores each ~2 mm<sup>2</sup>  
 442 arranged on a single microscope slide. Channels shown are Hoechst (gray), panCK (blue), CD45 (red),  $\alpha$ SMA  
 443 (purple), and CD32 (green). **d**, Dataset 4 (HNSCC, CODEX): two ~42 mm<sup>2</sup> whole-slide sections of human  
 444 HNSCC. Channels shown are DAPI (gray), CD8 (green), panCK (red), vimentin (blue), and CD20 (orange). **e**,  
 445 Dataset 5 (Tonsil, mIHC): an ~92 mm<sup>2</sup> whole-slide section of normal human tonsil. Channels shown are  
 446 Hoechst (gray), CD3 (red), CD20 (green), panCK (blue). **f**, Dataset 6 (Large intestine, CODEX, specimen 1):  
 447 an ~7 mm<sup>2</sup> whole-slide section of normal human large intestine from a 78-year-old African American male.  
 448 Channels shown are Hoechst (gray), CD31 (orange), CD49f (blue), CD45 (red), CD49a (green). **g**, Dataset 7

## An Interactive Quality Control Tool for Highly Multiplex Microscopy

449 (Large intestine, CODEX, specimen 2): an  $\sim 12$  mm<sup>2</sup> whole-slide section of normal human large intestine from  
450 a 24-year-old white male. Channels shown are Hoechst (gray), Vimentin (red), ITLN1 (blue), CD38 (orange),  
451  $\alpha$ SMA (green), Cytokeratin (purple). Markers to the right of each dataset indicate the full marker set captured  
452 in the corresponding image(s). See **Supplementary Table 1** for specimen identifiers and data access  
453 information.

## An Interactive Quality Control Tool for Highly Multiplex Microscopy

### Pre-QC TOPACIO data

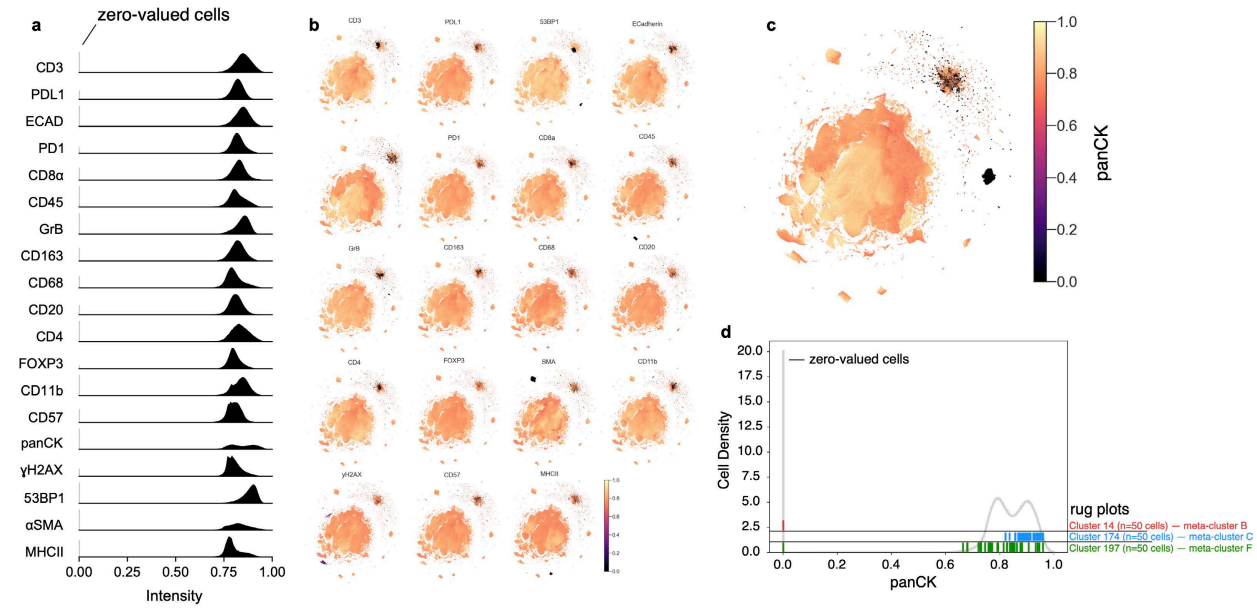

### Pre-QC TOPACIO data (zeros removed)

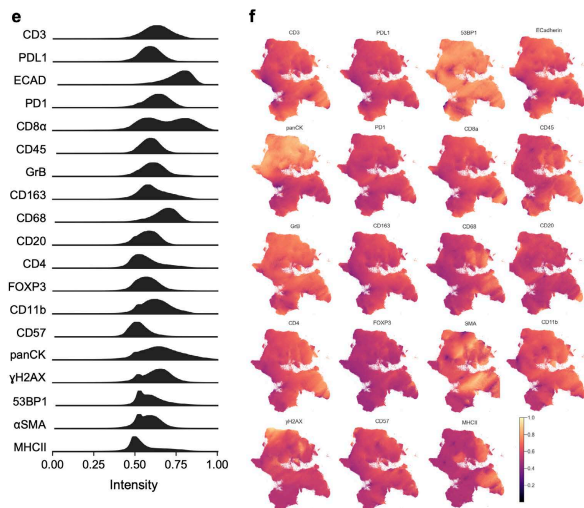

### Post-QC TOPACIO data

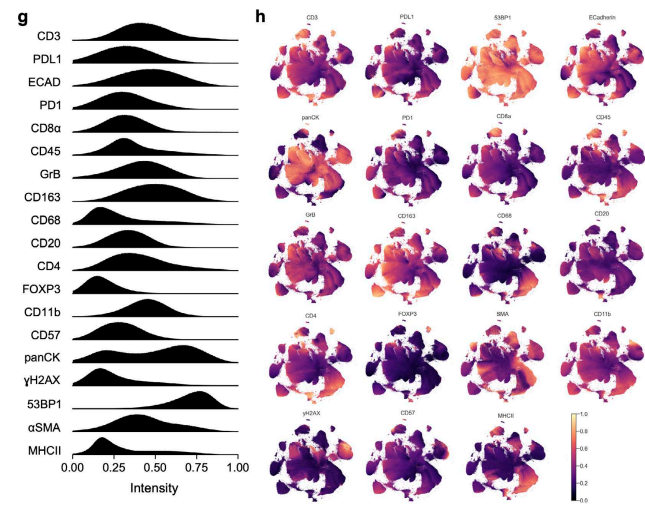

### Pre-QC CODEX data

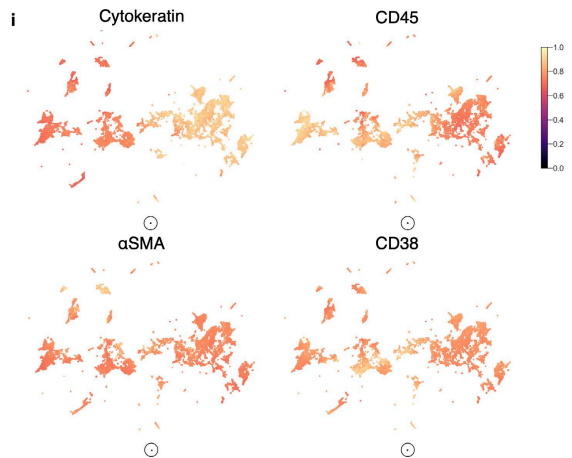

### Post-QC CODEX data

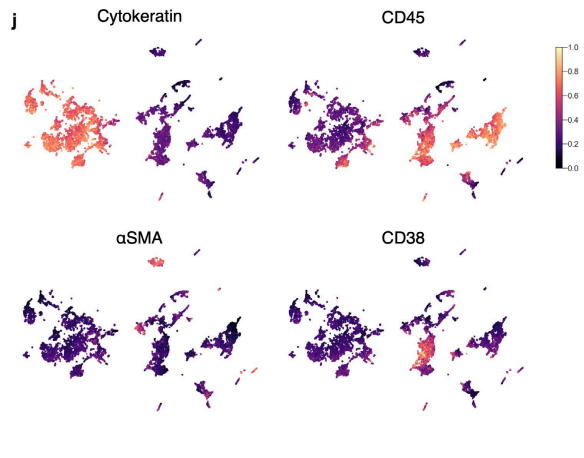

749

750 **Supplementary Fig. 2 | Impact of image background subtraction on derived single-cell data.** a, Ridge  
751 plots showing the distribution of cells according to channel signal intensities in the pre-QC TOPACIO dataset

## An Interactive Quality Control Tool for Highly Multiplex Microscopy

752 showing the presence of zero-valued cells in each channel (vertical lines at far left). **b**, Channel colormaps  
753 applied to cells in the pre-QC TOPACIO embedding showing the presence of small, dark clusters  
754 corresponding to cells with at or near-zero signal intensities in the corresponding channel which by contrast  
755 makes all other cells appear bright for a given marker. **c**, PanCK channel from panel (b) enlarged to show  
756 detail. **d**, Histogram distribution of cells in the pre-QC TOPACIO dataset according to panCK signal. Rugplot  
757 plots (vertical ticks at bottom of histogram) show where randomly selected cells from cluster 14 (meta-cluster  
758 B, red), cluster 174 (meta-cluster C, blue), and cluster 197 (meta-cluster F, green) reside in the distribution. **e**,  
759 Ridge plots showing the distribution of cells according to channel signal intensities in the pre-QC TOPACIO  
760 dataset after the removal of zero-valued cells. **f**, Channel colormaps applied to cells in the pre-QC TOPACIO  
761 embedding after the removal of zero-valued cells showing that small, dark populations of cells are abrogated by  
762 the removal of zero-valued outliers. **g**, Ridge plots showing the distribution of cells according to channel signal  
763 intensities in the post-QC TOPACIO dataset allowing the natural distribution of signals to become apparent. **h**,  
764 Channel colormaps applied to cells in the post-QC TOPACIO embedding showing high contrast between  
765 populations of immunonegative and immunopositive cells for each marker. **i**, Channel colormaps applied to  
766 cells in the pre-QC CODEX embedding (Dataset 6) showing scant dim outliers (circles) which, in contrast,  
767 make other cells in the embedding appear bright for each marker. See **Online Supplementary Fig. 9** for full  
768 set of marker channels. **j**, Channel colormaps applied to cells in the post-QC CODEX embedding showing high  
769 contrast between immunopositive and immunonegative cell populations cells after dim outliers have been  
770 removed. See **Online Supplementary Fig. 10** for full set of marker channels.

## An Interactive Quality Control Tool for Highly Multiplex Microscopy

### Training data statistics

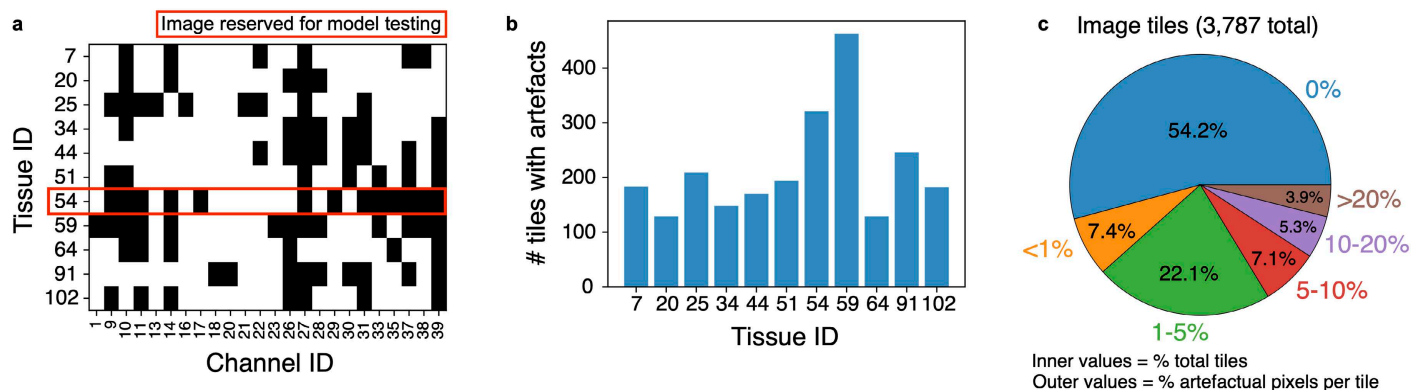

### Model performance

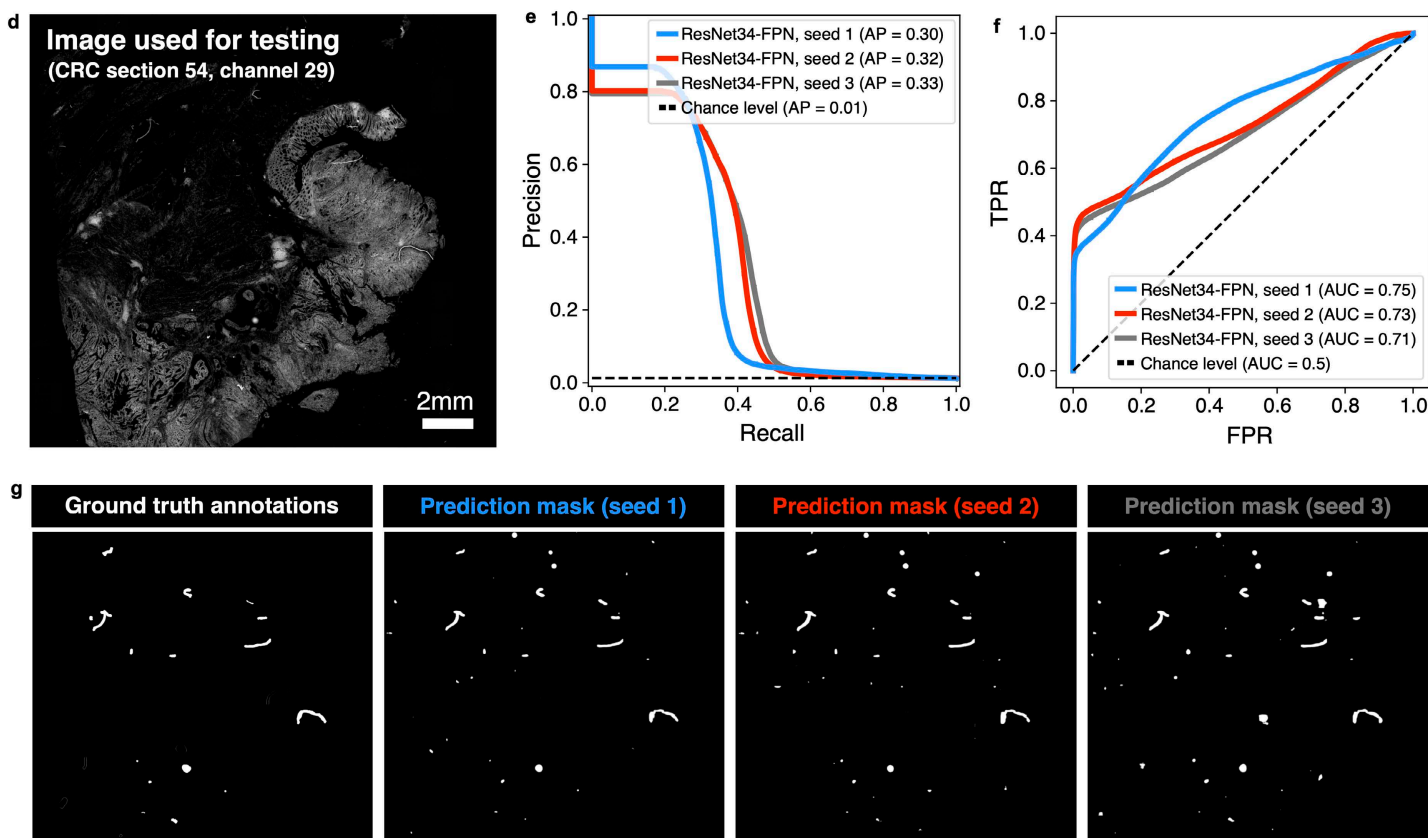

771

772 **Supplementary Fig. 3 | Developing a DL model for automated artefact detection tissue.** **a**, Binary matrix  
 773 showing the channels impacted by visual artefacts (e.g., illumination aberrations, slide debris, etc.) in 11  
 774 sections of the same CRC specimen. **b**, Bar chart showing the number of 2048x2048-pixel image tiles affected  
 775 by artefacts per tissue section. **c**, Pie chart showing the percentage of image tiles used for model training and  
 776 validation (inner percentages) containing different percentages of artefactual pixels (outer percentages). **d**,  
 777 CRC tissue section 54, channel 29 was used for model testing. **e**, Precision-recall plot showing the average  
 778 precision (AP) for three replicates of the ResNet-FPN model architecture whose FPN network was initialized  
 779 with different model weights to evaluate technical reproducibility. **f**, Receiver operating characteristic (ROC)

## An Interactive Quality Control Tool for Highly Multiplex Microscopy

780 curve showing the area under the curve (AUC) values for the same three replicates of the ResNet-FPN model  
781 shown in panel (e). **g**, Ground truth artefact mask (far left) and predicted artefact masks from the three replicate  
782 ResNet-FPN models.



## An Interactive Quality Control Tool for Highly Multiplex Microscopy

### 783 **Online Supplementary Fig. 1 | Example artefacts in Dataset 1 (TOPACIO)**

784 (<https://www.synapse.org/#!Synapse:syn53781614>). **a**, Twelve (12) examples of tissue folds. **b**, Twelve (12)  
785 examples of slide debris. **c**, Four (4) examples of coverslip air bubbles. **d**, Twelve (12) examples of image blur.  
786

### 787 **Online Supplementary Fig. 2 | Image galleries of clustering cells from pre-QC Dataset 2 (CRC)**

788 (<https://www.synapse.org/#!Synapse:syn53781627>). Twenty (20) examples of cells from each of 22 clusters  
789 identified in the pre-QC CRC dataset showing the top three most highly expressed markers (1: green, 2: red, 3:  
790 blue) and Hoechst dye (gray). A single white pixel at the center of each image highlights the reference cell.  
791 Nuclear segmentation outlines are superimposed to show segmentation quality.

792

### 793 **Online Supplementary Fig. 3 | Image galleries of clustering cells from pre-QC Dataset 6 (CODEX)**

794 (<https://www.synapse.org/#!Synapse:syn53781635>). Twenty (20) examples of cells from each of 32 clusters  
795 identified in the pre-QC CODEX dataset (normal large intestine, specimen 1) showing the top three highly  
796 expressed markers (1: green, 2: red, 3: blue) and Hoechst dye (gray). A single white pixel at the center of each  
797 image highlights the reference cell. Nuclear segmentation outlines are superimposed to show segmentation  
798 quality.

799

### 800 **Online Supplementary Fig. 4 | Image galleries of clustering cells from pre-QC Dataset 1 (TOPACIO)**

801 (<https://www.synapse.org/#!Synapse:syn53782191>). Twenty (20) examples of cells from each of 48 (of 492)  
802 clusters identified in the pre-QC TOPACIO dataset showing the top three most highly expressed markers (1:  
803 green, 2: red, 3: blue) and Hoechst dye (gray). A single white pixel at the center of each image highlights the  
804 reference cell. Nuclear segmentation outlines are superimposed to show segmentation quality.

805

### 806 **Online Supplementary Fig. 5 | Image tiles from Dataset 1 (TOPACIO)**

807 (<https://www.synapse.org/#!Synapse:syn53779745>). Down-sampled, single-channel images from the 25  
808 TNBC tissue specimens analyzed in this study used to estimate the number of image tiles impacted by  
809 microscopy artefacts. Artefact counts table and patient metadata table are also provided.

810

### 811 **Online Supplementary Fig. 6 | Image galleries of clustered cells from post-QC Dataset 2 (CRC)**

812 (<https://www.synapse.org/#!Synapse:syn53781719>). Twenty (20) examples of cells from each of 78 clusters  
813 identified in the post-QC CRC dataset showing the top three most highly expressed markers (1: green, 2: red, 3:  
814 blue) and Hoechst dye (gray). A single white pixel at the center of each image highlights the reference cell.  
815 Nuclear segmentation outlines are superimposed to show segmentation quality.

## An Interactive Quality Control Tool for Highly Multiplex Microscopy

816

817 **Online Supplementary Fig. 7 | Image galleries of clustered cells from post-QC Dataset 6 (CODEX)**

818 (<https://www.synapse.org/#!Synapse:syn53781730>). Twenty (20) examples of cells from each of 28 clusters  
819 identified in the post-QC CODEX dataset showing the top three most highly expressed markers (1: green, 2:  
820 red, 3: blue) and Hoechst dye (gray). A single white pixel at the center of each image highlights the reference  
821 cell. Nuclear segmentation outlines are superimposed to show segmentation quality.

822

823 **Online Supplementary Fig. 8 | Image galleries of clustered cells from post-QC Dataset 1 (TOPACIO)**

824 (<https://www.synapse.org/#!Synapse:syn53781892>). Twenty (20) examples of cells from each of 43 clusters  
825 identified in the post-QC TOPACIO dataset showing the top three highly expressed markers (1: green, 2: red,  
826 3: blue) and Hoechst dye (gray). A single white pixel at the center of each image highlights the reference cell.  
827 Nuclear segmentation outlines are superimposed to show segmentation quality.

828

829 **Online Supplementary Fig. 9 | Channel colormaps applied to cells in the pre-QC Dataset 6 (CODEX)**

830 embedding (<https://www.synapse.org/#!Synapse:syn53781812>).

831

832 **Online Supplementary Fig. 10 | Channel colormaps applied to cells in the post-QC Dataset 6 (CODEX)**

833 embedding (<https://www.synapse.org/#!Synapse:syn53781819>).
